# Supplementary material for: Does poly(ionic liquid) modulate the non-covalent interactions of chicken egg white lysozyme? Elucidation of biomolecular interactions between biomolecules and macromolecular solvents
Source: Royal Society of Chemistry journal article supplement (doi:10.1039/c9nj04078a), 2019-01-01

**Supporting Information**

**Does poly (ionic liquid) modulates the non-covalent interactions of hen egg white lysozyme: Elucidation of biomolecular Interactions between biomolecule and macromolecule solvent**

Navin Kumar Mogha, Niketa Yadav, Anamika Sindhu and Pannuru Venkatesu\*

Department of Chemistry, University of Delhi, Delhi - 110007, India

Table 1, Thermodynamic parameters for lysozyme interaction with PIL

| <b>PIL Concentrations (mg/mL)</b> | <b>T<sub>m</sub></b> | <b>ΔC<sub>p</sub></b> | <b>Δ<sub>u</sub>S (at T<sub>m</sub>)</b> |
|-----------------------------------|----------------------|-----------------------|------------------------------------------|
| Buffer                            | 342.08               | 0.39784               | 1.342                                    |
| 0.005                             | 343.33               | 0.53223               | 2.297                                    |
| 0.01                              | 344.15               | 0.79709               | 3.525                                    |
| 0.2                               | 345.52               | 0.7243                | 4.1921                                   |
| 0.8                               | 345.77               | 0.77109               | 3.7689                                   |
| 1                                 | 345.72               | 0.68677               | 3.792                                    |
| 1.5                               | 345.57               | 0.72599               | 3.927                                    |
| 2                                 | 345.67               | 0.69156               | 3.9508                                   |
| 3                                 | 345.82               | 0.68732               | 4.2415                                   |

## Crystal structure of Lysozyme

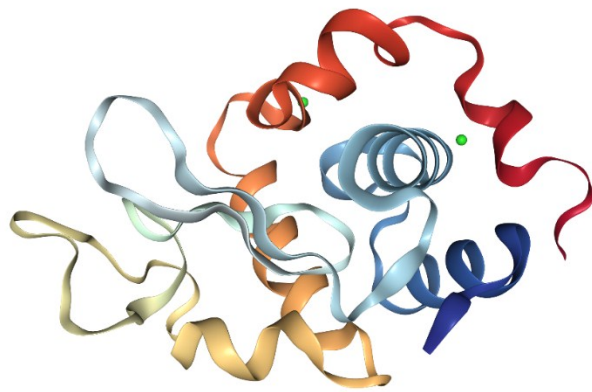

Supplement: c9nj04078a1.pdf [file c9nj04078a1.pdf]
